# Supplementary material
Source: publisher site journal article supplement (https://www.dovepress.com/article/520326)
Supplement: Supplementary file 1 [file 520326%20Supplementary%20Material.docx]

**Supplementary Table 1 Dataset information from gene expression omnibus (GEO).**

| **GSE** | **GPL** | **GSM** | **Title** |
| --- | --- | --- | --- |
| GSE89632 | GPL14951 | GSM2385757 | liver_HC_HLD-1 |
| GSE89632 | GPL14951 | GSM2385758 | liver_HC_HLD-2 |
| GSE89632 | GPL14951 | GSM2385759 | liver_HC_HLD-3 |
| GSE89632 | GPL14951 | GSM2385760 | liver_HC_HLD-4 |
| GSE89632 | GPL14951 | GSM2385761 | liver_HC_HLD-5 |
| GSE89632 | GPL14951 | GSM2385762 | liver_HC_HLD-7 |
| GSE89632 | GPL14951 | GSM2385763 | liver_HC_HLD-8 |
| GSE89632 | GPL14951 | GSM2385764 | liver_HC_HLD-10 |
| GSE89632 | GPL14951 | GSM2385765 | liver_HC_HLD-11 |
| GSE89632 | GPL14951 | GSM2385766 | liver_HC_HLD-13 |
| GSE89632 | GPL14951 | GSM2385767 | liver_HC_HLD-14 |
| GSE89632 | GPL14951 | GSM2385768 | liver_HC_HLD-21 |
| GSE89632 | GPL14951 | GSM2385769 | liver_HC_HLD-23 |
| GSE89632 | GPL14951 | GSM2385770 | liver_HC_HLD-26 |
| GSE89632 | GPL14951 | GSM2385771 | liver_HC_HLD-35 |
| GSE89632 | GPL14951 | GSM2385772 | liver_HC_HLD-36 |
| GSE89632 | GPL14951 | GSM2385774 | liver_HC_HLD-41 |
| GSE89632 | GPL14951 | GSM2385775 | liver_HC_HLD-43 |
| GSE89632 | GPL14951 | GSM2385776 | liver_HC_HLD-47 |
| GSE89632 | GPL14951 | GSM2385778 | liver_HC_HLD-51 |
| GSE89632 | GPL14951 | GSM2385779 | liver_HC_HLD-53 |
| GSE89632 | GPL14951 | GSM2385780 | liver_HC_HLD-55 |
| GSE89632 | GPL14951 | GSM2385781 | liver_HC_HLD-56 |
| GSE89632 | GPL14951 | GSM2385782 | liver_HC_HLD-66 |
| GSE89632 | GPL14951 | GSM2385721 | liver_NASH_CL-87 |
| GSE89632 | GPL14951 | GSM2385728 | liver_NASH_CL-97 |
| GSE89632 | GPL14951 | GSM2385729 | liver_NASH_CL-98 |
| GSE89632 | GPL14951 | GSM2385731 | liver_NASH_CL-103 |
| GSE89632 | GPL14951 | GSM2385732 | liver_NASH_CL-106 |
| GSE89632 | GPL14951 | GSM2385735 | liver_NASH_CL-111 |
| GSE89632 | GPL14951 | GSM2385736 | liver_NASH_CL-112 |
| GSE89632 | GPL14951 | GSM2385737 | liver_NASH_CL-113 |
| GSE89632 | GPL14951 | GSM2385739 | liver_NASH_CL-116 |
| GSE89632 | GPL14951 | GSM2385741 | liver_NASH_CL-118 |
| GSE89632 | GPL14951 | GSM2385742 | liver_NASH_CL-128 |
| GSE89632 | GPL14951 | GSM2385743 | liver_NASH_CL-132 |
| GSE89632 | GPL14951 | GSM2385748 | liver_NASH_CL-144 |
| GSE89632 | GPL14951 | GSM2385750 | liver_NASH_CL-147 |
| GSE89632 | GPL14951 | GSM2385751 | liver_NASH_CL-152 |
| GSE89632 | GPL14951 | GSM2385752 | liver_NASH_CL-155 |
| GSE89632 | GPL14951 | GSM2385753 | liver_NASH_CL-157 |
| GSE89632 | GPL14951 | GSM2385754 | liver_NASH_CL-160 |
| GSE89632 | GPL14951 | GSM2385756 | liver_NASH_CL-167 |

GSE: Gene Series; GPL14951: GEO platform, Illumina HumanHT-12 WG-DASL V4.0 R2 expression beadchip; GSM: Gene Samples. NASH: Nonalcoholic steatohepatitis.

**Supplementary Table 2** **Data Analysis Framework and Parameter Configuration Based on R Language**

| **Analysis Step** | **R Package / Function** | **Core Parameter** | **Values / Options** | **Scientific Basis** |
| --- | --- | --- | --- | --- |
| Differential expression analysis | DESeq2::results() | alpha | 0.05 | Control FDR<5% (Benjamin Hochberg correction) |
|  |  | lfcThreshold | 1 | Screening (log2FC, significant differentially expressed genes ≥ 1 (industry standard)) |
| enrichment | clusterProfiler | pAdjustMethod | "BH" | Multiple testing correction method |
|  |  | qvalueCutoff | 0.2 | Balancing false positives and biological correlations |
| PPI network construction | STRINGdb$new() | score_threshold | 400 | High confidence interaction (≥ 0.7 confidence) |
| WGCNA module detection | blockwiseModules() | minModuleSize | 30 | Ensure the biological significance of the module |
| eQTL Analysis | MatrixEQTL v2.3 | modelLINESAR, Matrix_eQTL_main | <1×10⁻⁵ | Expressing quantitative trait loci |

**Supplementary Table 3 SNPscan method for detecting SNP site-specific probe sequence of primers.**

| Gene | SNP |  | Primer | Identifying primer sequences |
| --- | --- | --- | --- | --- |
| KRT23 | rs72826004 | A1 | rs72826004_GF | TGGGAGCCCCTAGCCAGTCG |
|  |  | A2 | rs72826004_TF | TTTGGGAGCCCCTAGCCAGTCT |
|  |  | A3 | rs72826004_AF | TTGGGAGCCCCTAGCCAGTCA |
|  |  | Pc | rs72826004_3F | CAGCCACCTCCTGTGCCTGG |
| KRT23 | rs2269859 | A1 | rs2269859_CF | CCACCGCACCGCCATGTAC |
|  |  | A2 | rs2269859_TF | TTCCACCGCACCGCCATGCAT |
|  |  | Pc | rs2269859_3R | GGTGGGAGCCCTGGGGAAGCT |

**Supplementary Table 4 Study on the typing rate of SNPs and the results of Hardy Weinberg equilibrium (HWE) test.**

| **SNP** | **Call Rate (%)** | **Test for HWE (*P*-Value)** |
| --- | --- | --- |
| rs2269859 | 99.95 | 0.1526 |
| rs72826004 | 99.95 | 0.1019 |

**Supplementary Table 5 Primary antibodies used in this study.**

| **Peptide/ protein target** | **Host** | **Dilution used** | **Manufacturer** |
| --- | --- | --- | --- |
| KRT23 | Rabbit | 1:100 for IHC  1:1000 for Western blot | SANTA CRUZ BIOTECHNOLOGY, INC. |
| GAPDH | Rabbit | 1:5000 | Proteintech Group Inc |
| HRP-conjugated Goat Anti-Rabbit IgG (H+L) | Rabbit | 1:10000 | Proteintech Group Inc |
| HRP-conjugated Goat Anti-Rabbit IgG (FOR IHC) | Rabbit | 1:200 | Wuhan servicebio technology CO., LTD |

GAPDH was taken as a reference gene.

**Supplementary Table 6** **Sequence of primers.**

| **Genes** | **Species** | **Sequence** |
| --- | --- | --- |
| KRT23 | Mouse | F-GTCCGCATCTCCCTTTCCTTCAC |
|  |  | R-GCCTTGCCATTGCCACCTAGC |
| GAPDH | Mouse | F-ACATCATCCCTGCATCCACT |
|  |  | R-GTCCTCAGTGTAGCCCAAG |
| KRT23 | Human | F-CTTCTCCAGGCTCGCTCACC |
|  |  | R-GTTGAAGTCATCCACTGCCATCC |
| GAPDH | Human | F-AGAAGGCTGGGGCTCATTTG |
|  |  | R-AGGGGCCATCCACAGTCTTC |

GAPDH was taken as a reference gene.

**Supplementary Table 7 Univariate and multivariate** **Logistic analyses among the non-MAFLD and MAFLD patients**

| **Risk factors** | **Univariate Logistic regress** | |  | **Multivariate Logistic regress** | |
| --- | --- | --- | --- | --- | --- |
| **OR (95% CI) *P*-value** | | **OR (95% CI) *P*-value** | |
| rs72826004 |  |  |  |  |  |
| GG+GT/TT | 2.271 (1.245-4.142) | 0.007 |  | 2.082 (1.153-3.757) | 0.015 |
| rs2269859 |  |  |  |  |  |
| CC+CT/TT | 0.304 (0.146-0.634) | 0.001 |  | 0.317 (0.154-0.651) | 0.002 |
| Hypertension | 3.910 (2.94-5.199) | <0.001 |  | 3.77 (2.884-4.927) | <0.001 |
| T2DM | 1.97 (1.439-2.696) | <0.001 |  | 1.952 (1.433-2.659) | <0.001 |
| CAD | 7.031 (4.248-11.637) | <0.001 |  | 6.724 (4.181-10.813) | <0.001 |
| Smoking | 1.741 (1.241-2.442) | 0.001 |  | 1.589 (1.194-2.115) | 0.002 |
| Drinking | 0.883 (0.632-1.234) | 0.467 |  | - | - |
| Age | 0.997 (0.986-1.008) | 0.599 |  | - | - |
| Obesity | 7.766 (5.789-10.417) | <0.001 |  | 7.476 (5.613-9.958) | <0.001 |
| Gender | 1.121 (0.804-1.563) | 0.449 |  | - | - |
| Glucose>6.1mmol/L | 1.764 (1.243-2.505) | 0.001 |  | 1.745 (1.242-2.451) | 0.001 |
| TG | 1.061 (0.956-1.178) | 0.263 |  | - | - |
| TC | 0.761 (0.574-1.009) | 0.058 |  | - | - |
| HDL-c | 1.744 (1.016-2.993) | 0.044 |  | 0.724 (0.484-1.082) | 0.115 |
| LDL-c | 1.396 (1.003-1.943) | 0.048 |  | 0.945 (0.792-1.127) | 0.53 |

MAFLD: Metabolic Dysfunction Associated Fatty Liver Disease; T2DM: Type 2 Diabetes Mellitus; CAD: Coronary Artery Disease; Obesity: BMI>=28; TG: Triglyceride; TC: Total Cholesterol; LDL-C: Low-Density Lipoprotein Cholesterol; HDL-C: High-Density Lipoprotein Cholesterol; OR: Odds ratio, CI: Confidence Interval, P< 0.05 was considered significant difference.

**Supplementary Figure 1
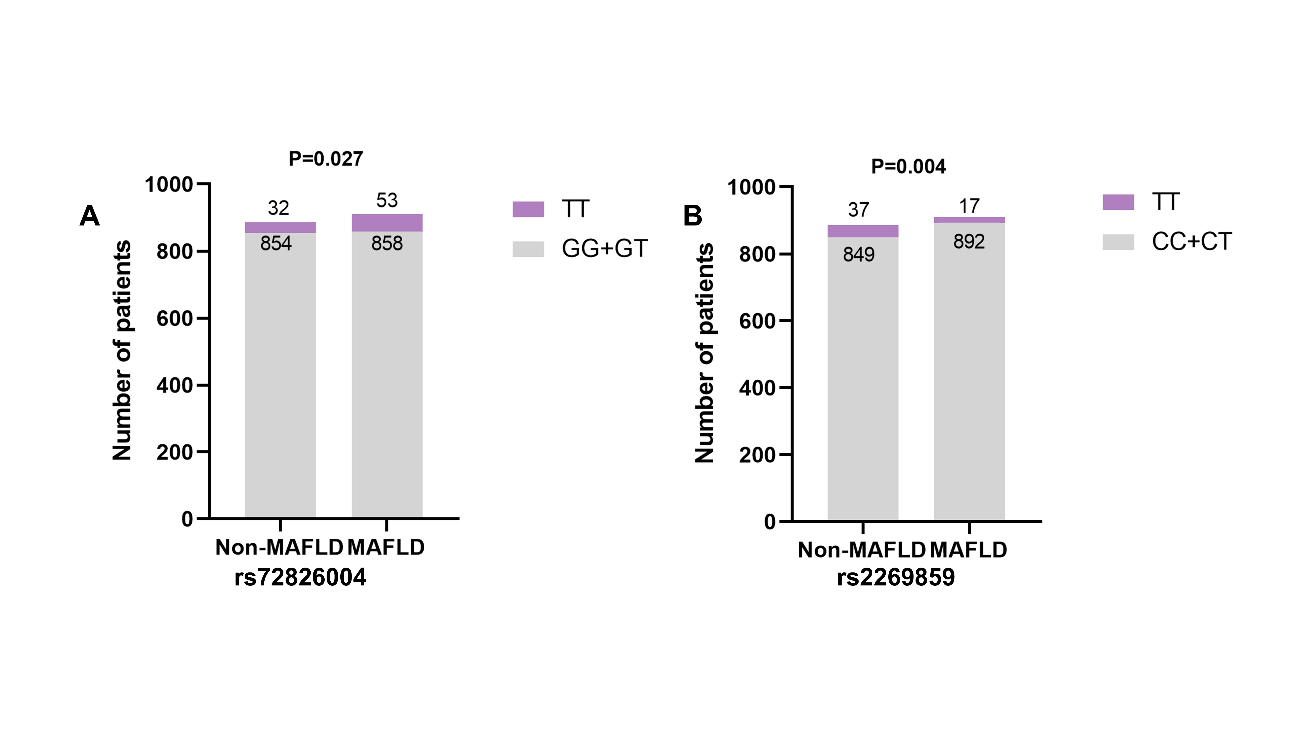
**

**Supplementary Figure 2**

**
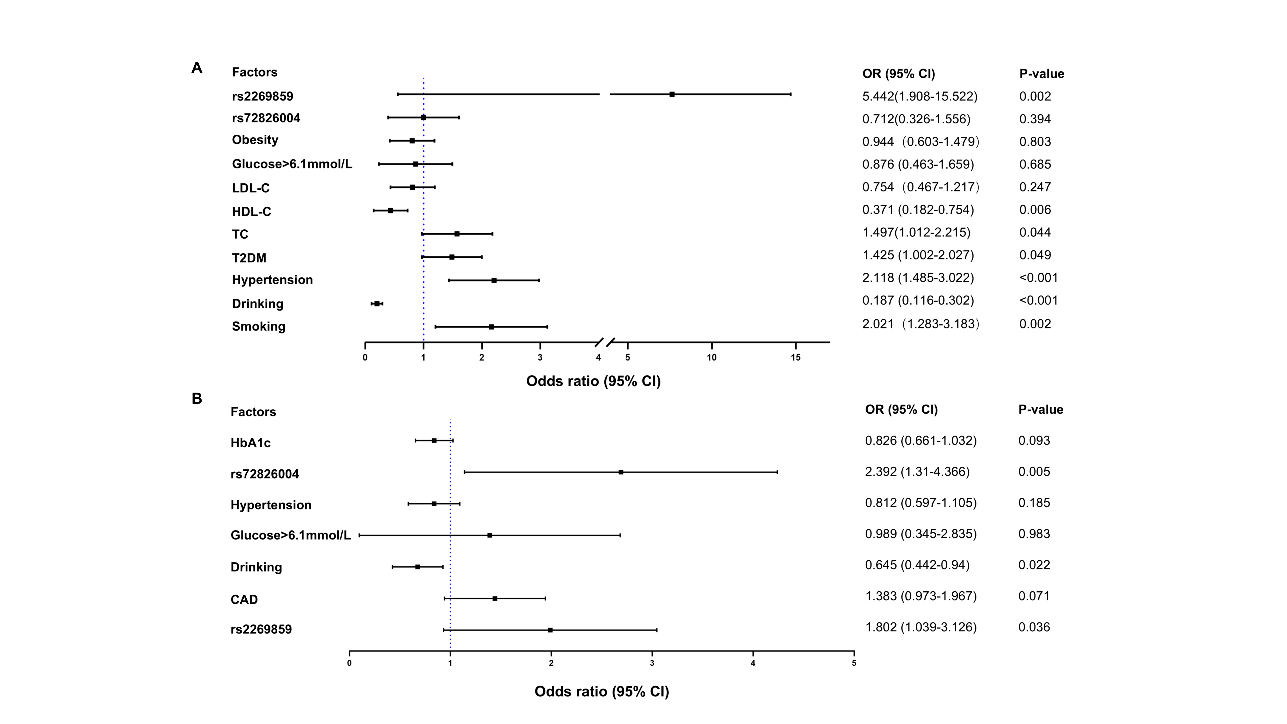
**

**Supplementary Figure 3**

**
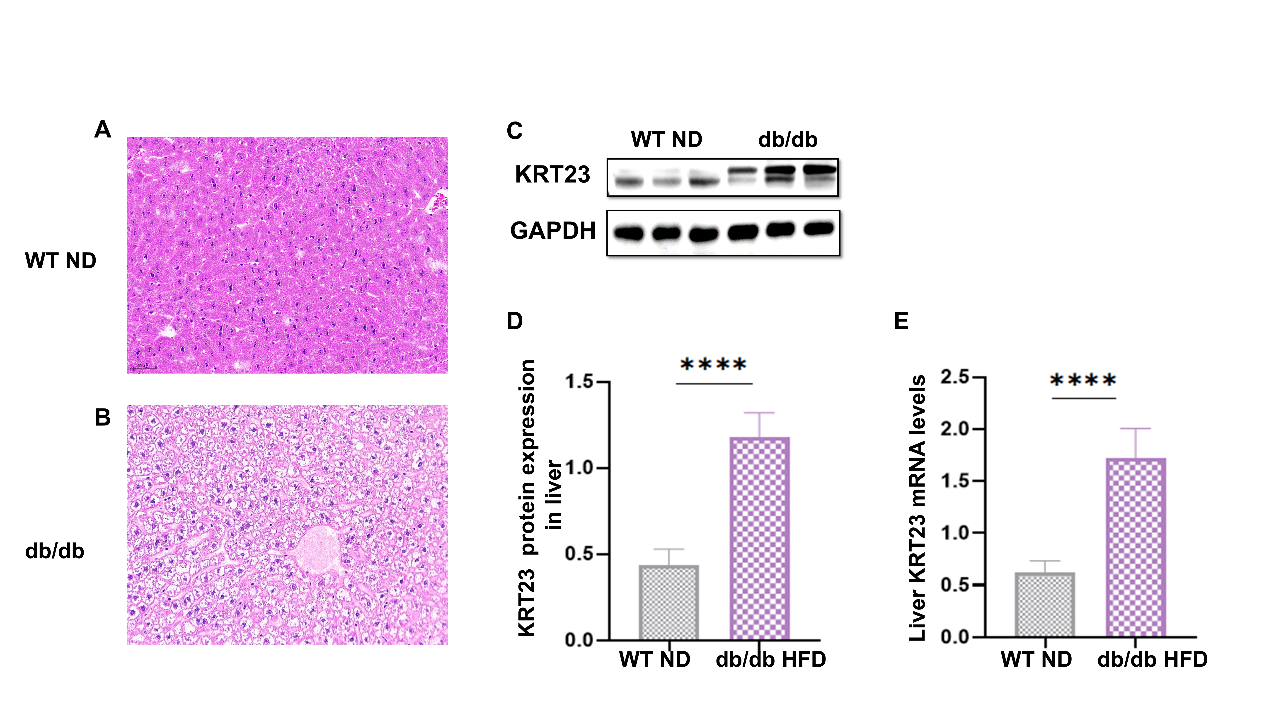
**

**Supplementary Figure legend**

**Supplementary Figure 1 KRT23 gene rs72826004 and rs2269859 loci are associated with MAFLD.**

**A:** KRT23 gene loci, including rs72826004 and rs2269859, were associated with MAFLD. The TT genotype of the KRT23 gene locus rs72826004 tended to increase the probability of MAFLD (32 (37.6%) vs. 53 (62.4%), P=0.027). **B:** The TT genotype of the KRT23 gene locus rs2269859 tended to protect individuals from MAFLD (37 (68.5%) vs. 17 (31.5%), P=0.004).

**Supplementary Figure 2** **Logistic regression analysis of risk factors in MAFLD combined with CAD, T2DM** **patients respectively.**

**A:** MAFLD combined with CAD patients; **B:** MAFLD combined with T2DM patients.

**Abbreviations:** OR: odds ratio; CI: confidence interval; obesity: BMI (body mass index)>28; LDL-C: Low-Density Lipoprotein Cholesterol; HDL-C: High-Density Lipoprotein Cholesterol; TC: Total Cholesterol; HbA1c: Hemoglobin A1C; T2DM: Type 2 Diabetes Mellitus, CAD: Coronary Artery Disease.

**Supplementary Figure 3** **Elevated expression of the KRT23 gene in db/db mice with MAFLD.**

The db/db mice showed more lipid deposition (**B**) compared with mice fed with normal diet (**A**), more KRT23 protein (**C, D**) and mRNA expression in liver (**E**). Note: * P<0.05, * * P<0.01, * * * P<0.001, and * * * * P<0.0001.
